# Supplementary material for: Immuno-PET Imaging of Siglec-15 Using the Zirconium-89-Labeled Therapeutic Antibody, NC318
Source: Hindawi journal article supplement (doi:10.1155/2023/3499655), 2023-02-09
Supplement: f1 [file 3499655.f1.docx]

**Supplemental Information**

**Immuno-PET imaging of Siglec-15 using the zirconium-89 labeled therapeutic antibody, NC318**

Elaine M. Jagoda**1**, Falguni Basuli**2**, Colleen Olkowski**1**, Ido Weiss**3**, Tim E. Phelps**1**, Karen Wong**1**, Anita Thien Ton**1**, Kelly C. Lane**2**, Steve Adler**1, 5**, Donna Butcher**4**, Elijah F. Edmondson**4**, Sol Langermann3, and Peter L. Choyke**1**

**1**Molecular Imaging Branch, National Cancer Institute, Bethesda, MD, USA; **2**Chemistry and Synthesis Center, National Heart, Lung, and Blood Institute, National Institutes of Health, Bethesda, MD, USA; **3**NextCure, Beltsville, MD, USA; **4**Molecular Histopathology Lab, Frederick National Laboratory for Cancer Research, NCI, Frederick, MD, USA; **5**Clinical Research Directorate, Frederick National Laboratory for Cancer Research, Frederick, MD, USA

***Storage and in vitro serum stability***

**Table S1:** Stability of [89Zr]Zr-DFO-NC318 in saline at 4 °C

| [89Zr]Zr-DFO-NC318  Concentration (mCi/mL) | % intact, including aggregate | |
| --- | --- | --- |
| Day1 | Day2 |
| 1.0 | 95 | 91 |

**HPLC Chromatogram:**

**A**)


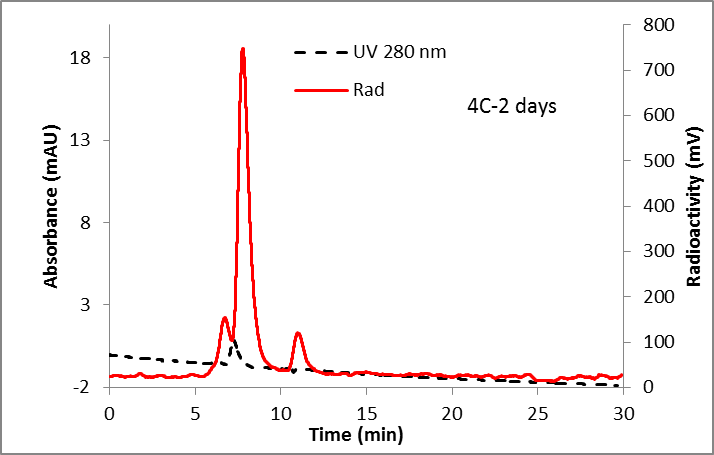

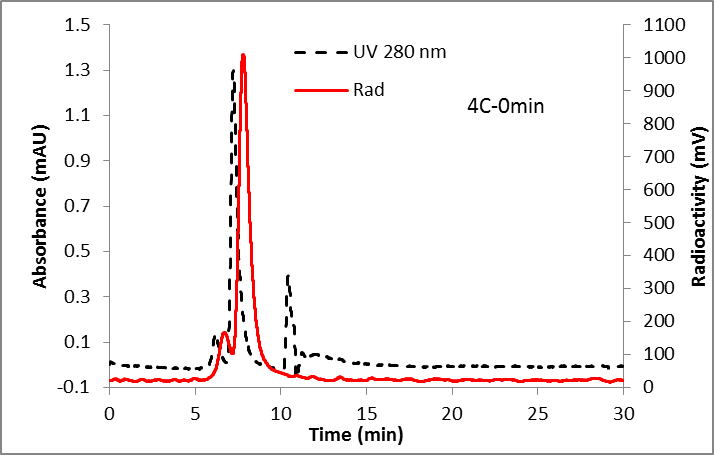


**B**)

**Figure S1.** HPLC of [89Zr]Zr-DFO-NC318 in saline at 4 °C; **A**) 0 min; **B**) 2 days; HPLC condition: eluent, 0.1 M sodium phosphate, 0.1 M sodium sulfate, 0.05% sodium azide, 10% iso-propyl alcohol (pH 6.8), flow rate 0.3 mL/min; black line UV detector, red line radiodetector.

Whole human serum stability at 37 °C indicated 48% decomposition in 4 days (**Figure S2**) which remained unchanged from 4 to 7 days **(Table S2**).

**Stability Table S2**: Stability: of [89Zr]Zr-DFO-NC318 in whole human serum (WHS) at 37 ˚C

(300 µL of [89Zr]Zr-DFO-NC318 + 700 uL of WHS, both in saline)

| [89Zr]Zr-DFO-NC318  Concentration (mCi/mL) | % intact, including aggregate | | | | | | |
| --- | --- | --- | --- | --- | --- | --- | --- |
| Day1 | Day2 | Day3 | Day4 | Day5 | Day6 | Day7 |
| 1 | 87 | 73 | 57 | 52 | ND | 52 | 52 |

**HPLC Chromatogram:**

**A)**


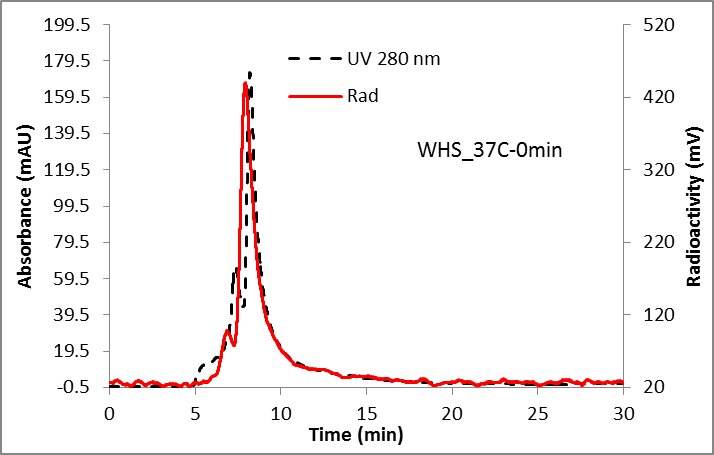


**B)**


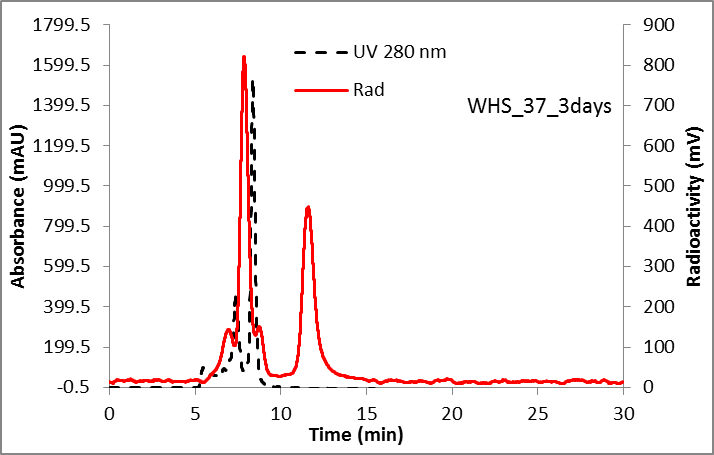


**C**)


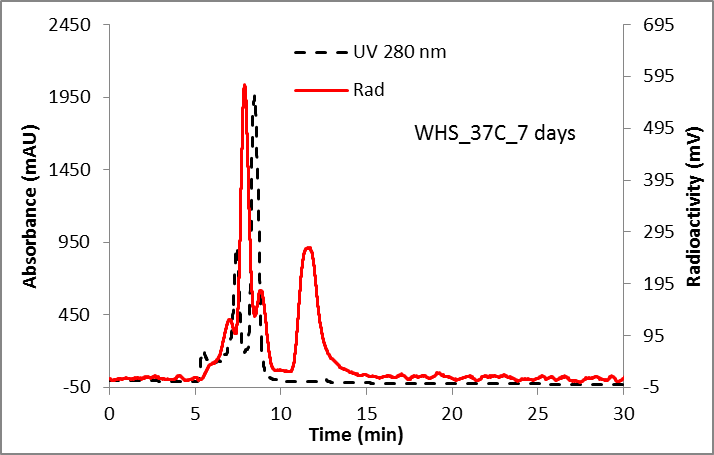


**Figure S2.** HPLC of [89Zr]Zr-DFO-NC318 in whole human serum at 37 °C; **A)** 0 min; **B)** 3 days; **C**) 7 days. HPLC condition: eluent, 0.1 M sodium phosphate, 0.1 M sodium sulfate, 0.05% sodium azide, 10% iso-propyl alcohol (pH 6.8), flow rate 0.3 mL/min; black line UV detector, red line radiodetector.

**iTLC Chromatogram:**

**A)**

**B)**

**C)**

**D)**


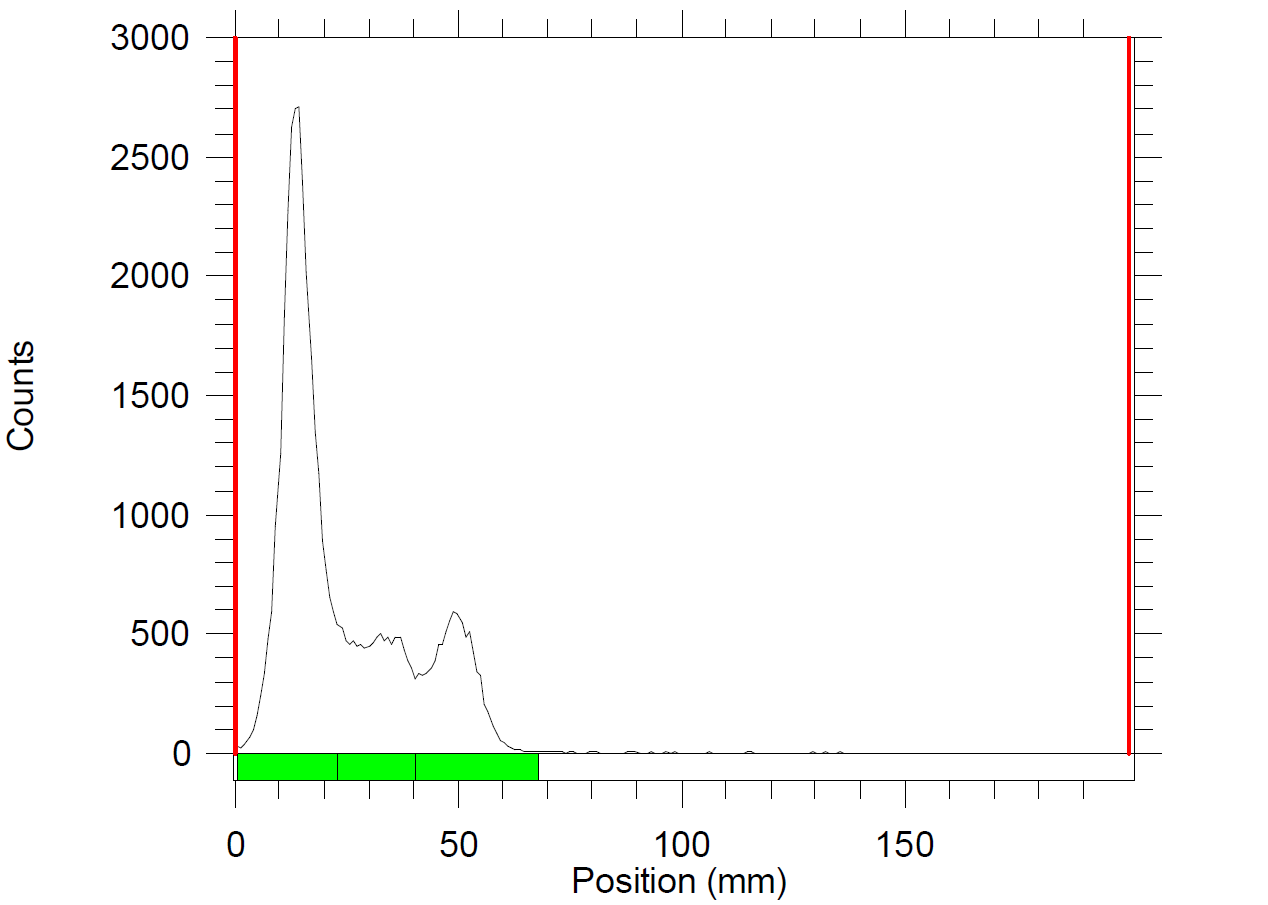


**Figure S3.** iTLC of [89Zr]Zr-oxalate and [89Zr]Zr-DFO-NC318 in whole human serum at 37 °C; **A)** [89Zr]Zr-oxalate; [89Zr]Zr-DFO-NC318 **B)** 0 min; **C)** 3 days; **D**) 7 days. iTLC condition: TEC-control-chromatography strips, model#150-771, developer, 0.1 M EDTA pH 7.
